## Minireview

Dual Function of 11 $\beta$ -Hydroxysteroid Dehydrogenase in Placenta: Modulating Placental Glucocorticoid Passage and Local Steroid Action<sup>1</sup>Peter J. Burton and Brendan J. Waddell<sup>2</sup>*Department of Anatomy and Human Biology, The University of Western Australia, Nedlands, Perth, Western Australia 6907, Australia*

## ABSTRACT

Target cell metabolism of glucocorticoids is now recognized as an important modulator of ligand access to the glucocorticoid receptor (GR). This metabolism occurs via two distinct 11 $\beta$ -hydroxysteroid dehydrogenase (11 $\beta$ -HSD) enzymes (types 1 and 2) that catalyze interconversion of active glucocorticoids (cortisol and corticosterone) and their inactive 11-keto products (cortisone and 11-dehydrocorticosterone, respectively). The focus of this review is on the biology of the 11 $\beta$ -HSD enzymes in the placenta, where they also regulate passage of maternal glucocorticoids to the fetus. The presence of this metabolic barrier at the maternal-fetal interface is potentially crucial to fetal growth and development, since maternal glucocorticoid levels are elevated in pregnancy and since excess glucocorticoid exposure in fetal life has detrimental effects on prenatal growth and increases susceptibility to disease in subsequent adult life. In primates, transplacental glucocorticoid passage also appears to play an important role in the induction of an autonomous fetal hypothalamic-pituitary-adrenal axis near term. Placental 11 $\beta$ -HSD is also likely to modulate glucocorticoid actions within the placenta, per se, by regulating their access to placental GR. Moreover, because some progesterone effects are exerted via the GR, placental 11 $\beta$ -HSD may regulate progesterone-glucocorticoid competition for access to this receptor and thereby affect the biological actions of both steroids in the placenta.

## INTRODUCTION

Adrenal glucocorticoid hormones exert potent effects on cellular function in essentially all organ systems, particularly in terms of differentiation and homeostasis. These actions are of particular importance in mammalian pregnancy, with glucocorticoids known to influence metabolic adaptation in the mother [1, 2], maturation of fetal organ systems [3], and the timing of parturition [4]. Associated with these roles are marked and sustained changes in the maternal hypothalamic-pituitary-adrenal (HPA) axis with advancing gestation, with a rise in plasma glucocorticoids characteristic of late pregnancy in a range of different species [1, 2, 5].

While maternal glucocorticoids presumably serve to mobilize energy stores for the rapidly growing fetus near term [2], they can also have profound effects on fetal growth [6] and development [3] if they cross the placenta to reach the

fetal circulation. It is now well established that transplacental passage of glucocorticoids is regulated within the placenta by 11 $\beta$ -hydroxysteroid dehydrogenase (11 $\beta$ -HSD) enzymes [7] that interconvert active and inactive glucocorticoids. Because glucocorticoids provide key signals in cellular differentiation, many of their effects are long-lasting, and excess glucocorticoid exposure in utero has been directly linked to the subsequent development of disease in adult life [8] (see below).

The placenta is also a glucocorticoid target organ per se, with placental growth [6, 9] and endocrine function [10] known to be affected by glucocorticoids. Glucocorticoid-binding activity [11, 12] and mRNA encoding the glucocorticoid receptor [13] are readily demonstrable in placental tissue. Clearly, therefore, the placenta is a central player in the biology of glucocorticoids in pregnancy, not only because of its location at the maternal-fetal interface, but also as a reflection of its central role in hormone-dependent adaptations in the mother. This review details the roles of the placental 11 $\beta$ -HSD enzymes in determining passage of maternal glucocorticoids to the fetus and modulating local glucocorticoid actions within the placenta.

*Glucocorticoid Hormone Action and 11 $\beta$ -HSD*

Glucocorticoids exert their biological action via interaction with at least two distinct receptors (types I and II, or mineralocorticoid receptor and glucocorticoid receptor [GR], respectively) in target cells, with the clear majority of effects occurring via GR (for review see [14]). Extensive work over the last decade has established that access of glucocorticoid hormones to their receptors within target cells is regulated by the local expression of the enzyme 11 $\beta$ -HSD (for reviews see [15, 16]). Two distinct gene products that exhibit 11 $\beta$ -HSD activity are now recognized. The type 1 form (11 $\beta$ -HSD-1) is NADP<sup>+</sup>/H-preferring with a  $K_m$  in the micromolar range for corticosterone and cortisol; it was originally purified [17] and the cDNA cloned [18] from rat liver. Although 11 $\beta$ -HSD-1 can catalyze the interconversion of active cortisol with the biologically inert cortisone (or corticosterone and 11-dehydrocorticosterone in rodents), this form of the enzyme appears to act primarily as an 11-oxoreductase in vivo (i.e., formation of cortisol and corticosterone from their 11-keto forms) [19–21]. Accordingly, 11 $\beta$ -HSD-1 messenger RNA expression is highly correlated with 11-oxoreductase activity in rat myometrium [22] and placenta (see below). The 11 $\beta$ -HSD-1 enzyme is widely distributed in glucocorticoid target tissues

Accepted September 24, 1998.

Received August 6, 1998.

<sup>1</sup>Supported by the National Health and Medical Research Council of Australia (Project Grant 970132).<sup>2</sup>Correspondence. FAX: 61 8 9380 1051; e-mail: bwaddell@anhb.uwa.edu.au

including the liver [23], brain [24, 25], uterus [22, 26–28], and ovary [29].

In contrast to 11 $\beta$ -HSD-1, the type 2 form (11 $\beta$ -HSD-2) is NAD<sup>+</sup> dependent, has a  $K_m$  in the nanomolar range for corticosterone and cortisol, and catalyses their conversion to 11-dehydrocorticosterone and cortisone, essentially unidirectionally [30–33]. The 11 $\beta$ -HSD-2 cDNA was initially cloned from kidney in several species [30–34], and subsequently the protein was purified from human placenta by Brown et al. [35]. 11 $\beta$ -HSD-2 is expressed primarily in mineralocorticoid target tissues [36–38], the female reproductive tract [22, 28, 39], the corpus luteum of the ovary [40], and the placenta (see below).

#### Placental 11 $\beta$ -HSD Bioactivity

Studies in the 1950s first established that high levels of cortisone could be isolated from human placenta [41, 42], with Osinski [43] subsequently demonstrating the presence of 11 $\beta$ -HSD bioactivity in homogenates of term human placenta and chorion. A decade later, Pasqualini et al. [44] showed that the midgestation human placenta was capable of interconverting radiolabeled cortisol and cortisone *in vivo*. It was subsequently shown that up to 85% of cortisol injected into the maternal circulation eventually reached the umbilical circulation as cortisone [45]. These early data showing substantial 11 $\beta$ -HSD bioactivity in the placenta have since been confirmed by extensive research in the human [35, 46–51] and in several other species including the baboon [47, 52–55], sheep [56, 57], rat [9, 48, 58–60], and pig [61].

From a functional standpoint, placental 11 $\beta$ -HSD is generally assumed to provide a glucocorticoid barrier at the maternal-fetal interface by inactivating maternal cortisol and corticosterone (via 11 $\beta$ -dehydrogenase activity) [7], but the reverse 11-oxoreductase activity may also be important physiologically. Measurement of this enzyme activity *in vitro*, however, has proven difficult because of its relative instability following cell disruption. Thus, Burton and Waddell [9] demonstrated that while tissue fragments of rat placenta efficiently convert 11-dehydrocorticosterone to corticosterone, this 11-oxoreductase activity was almost completely abolished by homogenization. Similarly, Lakshmi et al. [50] showed that although 11-oxoreductase activity was measurable in subcellular fractions of human placenta under conditions of low pH, this activity was very labile.

#### 11 $\beta$ -HSD-1 and -2 Gene Expression

On the basis of cofactor preference, 11 $\beta$ -HSD-2 appears to be the major form expressed in the placenta [48], consistent with its recent purification from human placenta [35] and expression of its mRNA and protein in human [35, 49, 51, 62–65], baboon [54, 55], and rat [37, 39, 60] placenta. Expression of 11 $\beta$ -HSD-2 has been specifically localized to the syncytiotrophoblast by *in situ* hybridization in the rat [13, 39] and by immunocytochemistry in the human placenta [62, 63]. Despite this clear evidence for 11 $\beta$ -HSD-2 expression in the placenta, 11 $\beta$ -HSD bioactivity is still readily apparent in the rat [9, 48], human [50], and pig [61] placenta with NADP<sup>+</sup> as cofactor, and placental tissue fragments exhibit substantial 11-oxoreductase activity [9, 54, 60]. Both of these observations suggest that the placenta may also express 11 $\beta$ -HSD-1, and mRNA for 11 $\beta$ -HSD-1 has been observed in the placenta of the sheep [56, 57], baboon [54, 55], and rat [60]. In contrast, Stewart et al. [51, 64] did not detect 11 $\beta$ -HSD-1 expression in human placen-

tal villous tissue, consistent with the recent observation of Sun et al. [63] that 11 $\beta$ -HSD-1 immunoreactivity was not detectable in syncytiotrophoblast but was present in human extravillous trophoblast, fetal membranes, and endothelial cells. In other species, however, mRNA encoding 11 $\beta$ -HSD-1 has been specifically localized to the syncytiotrophoblast (baboon [55]; rat [13]), and it is also noteworthy that there are marked differences in 11 $\beta$ -HSD-1 (and 11 $\beta$ -HSD-2) expression between the two major zones of the rat placenta [13, 60] (see below).

It is clear, therefore, that while the placenta expresses both forms of 11 $\beta$ -HSD, the relative expression of each varies considerably among species and even within the placenta of a given species. How the two enzymes interact in a physiological setting is less clear, but a major determinant of this interaction will be the apparent Michaelis constant ( $K_m$ ) of each 11 $\beta$ -HSD enzyme. Given the nanomolar  $K_m$  levels for 11 $\beta$ -HSD-2, this form is more likely to play an important physiological role. Notably, however, despite its high  $K_m$  (in the micromolar range), 11 $\beta$ -HSD-1 may act as a physiological 11 $\beta$ -dehydrogenase in the placenta [7] as it does in the rat testis [66].

#### Gestational Changes in Placental 11 $\beta$ -HSD

Given the crucial role played by glucocorticoids in fetal growth and development, gestational changes in placental 11 $\beta$ -HSD expression and associated bioactivity could provide key regulatory signals by altering fetal exposure to maternal glucocorticoids. Changes in placental 11 $\beta$ -HSD bioactivity with advancing pregnancy were first noted by Giannopoulos et al. [67], who showed that the relative amount of 11-oxoreductase activity increased toward term in fragments of placental tissue, although 11 $\beta$ -dehydrogenase activity always predominated. As discussed above, however, the favored direction of 11 $\beta$ -HSD activity *in vitro* is greatly influenced by enzyme stability as well as assay conditions (substrate supply, pH, etc.), and so the relevance to placental physiology remains uncertain. On the other hand, indirect estimates of placental 11 $\beta$ -HSD activity *in vivo* (by the constant isotope infusion approach) have demonstrated a shift from 11-oxoreductase to 11 $\beta$ -dehydrogenase dominance between mid and late gestation in the baboon, implying an increase in the placental glucocorticoid barrier over this period [68] (see Fig. 1). Consistent with this observation, mRNA for both 11 $\beta$ -HSD-1 and -2 increases in the baboon placenta with advancing pregnancy [55], although the relative contribution of these two enzymes to placental glucocorticoid metabolism *in vivo* remains uncertain.

Marked changes in placental 11 $\beta$ -HSD bioactivity have also been observed with advancing gestation in other species, but no consistent pattern in the nature of this change is evident. Thus, while 11 $\beta$ -dehydrogenase bioactivity decreases with advancing pregnancy in sheep placenta [7], it increases toward the end of gestation in the rat (whole placenta) [9] and pig [61]. While these inconsistencies may reflect important species differences in the function of 11 $\beta$ -HSD, recent work in the rat suggests that they could relate at least in part to regional differences in 11 $\beta$ -HSD expression within placental tissue. Thus, although 11 $\beta$ -dehydrogenase activity clearly increased toward term in fragments of whole placenta [9], separate analysis of the two morphologically and functionally distinct placental zones (basal and labyrinth) showed opposite patterns of change [60]. Specifically, while net 11 $\beta$ -dehydrogenase bioactivity (11 $\beta$ -

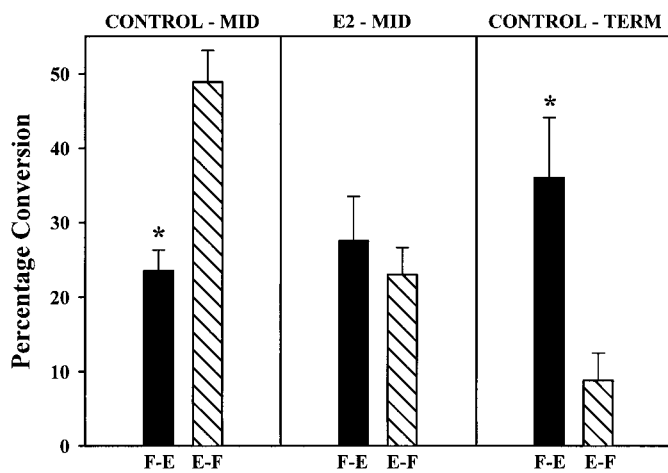

FIG. 1. Transuteroplacental interconversion (%) of cortisol (F) and cortisone (E) in untreated baboons at midgestation (CONTROL-MID) and term (CONTROL-TERM), and in baboons treated with androstenedione for 30 days to elevate placental estrogen production at midgestation (E2-MID). Values are the mean  $\pm$  SEM ( $n = 4-5$  per group). Asterisk indicates that the percentage conversion of F to E differs ( $p < 0.05$ ) from that of E to F. Redrawn from Pepe et al. [69].

dehydrogenase minus 11-oxoreductase) in the labyrinth zone (the major site of maternal-fetal exchange) fell between Days 16 and 22 of pregnancy (term = Day 23), over the same period the net activity increased in the basal zone (the major site of placental steroid and peptide hormone synthesis) [60]. Consistent with these changes in bioactivity, 11 $\beta$ -HSD-1 mRNA expression increased dramatically in the labyrinth zone, while that for 11 $\beta$ -HSD-2 increased in basal zone but almost completely disappeared from the labyrinth zone [13, 60] (see Fig. 2). Further studies are required to establish whether similar regional differences exist in the patterns of placental 11 $\beta$ -HSD-1 and -2 expression in other species. Interestingly, Pepe et al. [55] have proposed that regional distribution of the two enzymes occurs within baboon placenta, since immunoreactive 11 $\beta$ -HSD-2, but not 11 $\beta$ -HSD-1, was lost following collagenase dispersion. Moreover, an apparent shift in 11 $\beta$ -HSD-2 immunolocalization away from the apical region of syncytiotrophoblast was evident with advancing gestation [55].

#### Regulation of Placental 11 $\beta$ -HSD

The changing expression patterns of 11 $\beta$ -HSD-1 and -2 in the adjacent zones of the rat placenta [13, 60], and the gestational increases in placental 11 $\beta$ -HSD bioactivity in other species [7, 55, 61, 68], suggest that the 11 $\beta$ -HSD proteins are highly regulated in a tissue-specific manner. In the baboon, experimental elevation of placental estrogen synthesis at midgestation was shown to alter cortisol/cortisone metabolism *in vivo* [69] (see Fig. 1) and placental 11 $\beta$ -HSD activity *in vitro* [53] to more closely approximate that observed at term pregnancy. Moreover, treatment of cultured baboon syncytiotrophoblast with estrogen *in vitro* increased 11 $\beta$ -dehydrogenase bioactivity [52]. Collectively, these studies suggest that estrogen may be the primary regulator of placental 11 $\beta$ -HSD in the baboon, consistent with recent observations that estrogen potentially up-regulates both 11 $\beta$ -HSD-1 and -2 expression in the nonpregnant rat uterus [28]. Whether estrogen has a similar regulatory role in the rat placenta is uncertain, but estrogen levels do rise progressively toward term in this species [70], coincident with marked changes in placental 11 $\beta$ -HSD expression. Other

#### a) 11 $\beta$ -HSD-1

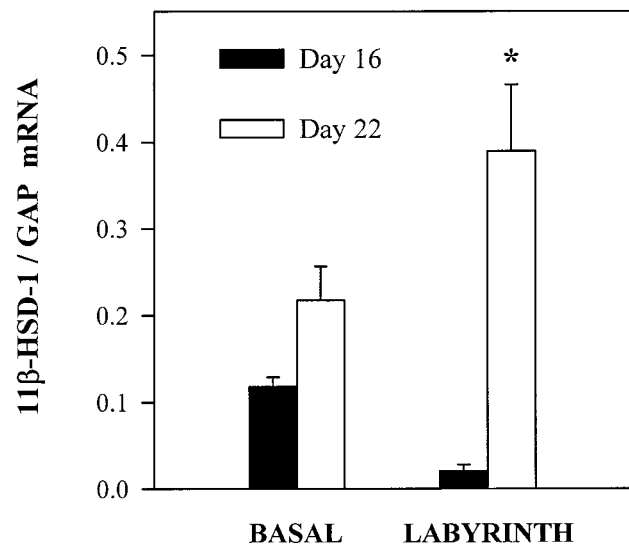

#### b) 11 $\beta$ -HSD-2

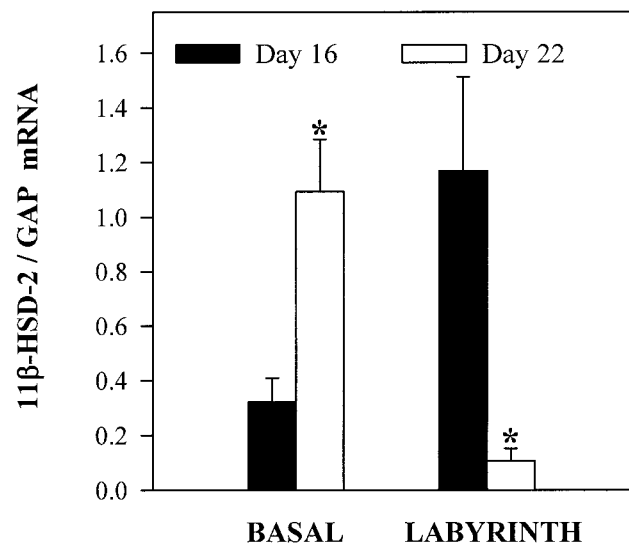

FIG. 2. Changes in placental basal and labyrinth zone expression of a) 11 $\beta$ -HSD-1 and b) 11 $\beta$ -HSD-2 mRNA transcripts between Days 16 and 22 of rat pregnancy (term = Day 23). The 11 $\beta$ -HSD-1 and 11 $\beta$ -HSD-2 mRNAs were measured by S1 nuclease protection assay and normalized to the corresponding glyceraldehyde-3-phosphate dehydrogenase (GAP) signal. Values are the mean  $\pm$  SEM ( $n = 3$  per group). \*  $p < 0.05$  compared with corresponding Day 16 value (unpaired  $t$ -test). Although 11 $\beta$ -HSD-1 mRNA expression in the basal zone appeared to increase between Days 16 and 22, the increase just failed to reach statistical significance ( $p = 0.071$ ). Redrawn from Burton et al. [60].

possible regulatory factors include steroids (e.g., progestins and androgens) or peptide hormones (e.g., rat placental lactogens) produced locally in the placenta operating in a paracrine manner. Since hormone production occurs primarily in the basal zone of the rat placenta [71], such paracrine regulation could also account for the differences in 11 $\beta$ -HSD-2 expression between the two zones. Sun et al. [65] have recently shown that progesterone inhibits 11 $\beta$ -HSD-2 mRNA expression in human syncytiotrophoblasts *in vitro*, and kinetic inhibition of placental 11 $\beta$ -HSD activity by progesterone has long been recognized [47, 72].

### Functional Significance of Placental 11 $\beta$ -HSD

a) *The placental glucocorticoid barrier.* The function of placental 11 $\beta$ -HSD is obviously dependent on the dominant direction of the catalyzed reaction (11-oxoreductase vs. 11 $\beta$ -dehydrogenase activity) *in vivo*, but as discussed above, enzyme lability *in vitro* has led to uncertainties in this regard. For this reason, some of the most instructive experiments relating to the function of placental 11 $\beta$ -HSD are the series of studies by Pepe and coworkers [68, 69, 73, 74] in which the fate of maternally or fetally infused radiolabeled cortisol and cortisone was followed. This approach provides an indirect measure of 11 $\beta$ -HSD bioactivity *in vivo*, thus retaining the normal range of substrate concentrations while avoiding problems associated with cell dispersion or disruption. These studies demonstrated that the placenta can serve as a barrier to the transfer of maternal glucocorticoids to the fetus, as originally proposed by Osinski [43]. Importantly, however, they also revealed the dynamic nature of this placental glucocorticoid barrier, which although possibly species-specific has provided an important conceptual framework in which to consider its physiological implications. Moreover, the incompleteness of this barrier, first highlighted by these *in vivo* studies, is now a crucial part of our understanding of the fetal glucocorticoid environment and its implications for fetal growth and subsequent development of disease in adult life [75] (see below).

The main thrust of the baboon studies alluded to above is that transfer of active glucocorticoid from mother to fetus is relatively high at midgestation compared with late pregnancy. Indeed, comparison of the relative specific activities of radiolabeled cortisol in maternal and fetal compartments shows that at midgestation, effectively all of the cortisol present in the fetal circulation is maternal in origin, consistent with the absence of 3 $\beta$ -HSD expression in the fetal adrenal at this time [68]. Pepe and colleagues [68, 69, 74, 76] have hypothesized that as pregnancy progresses, this transfer of maternal cortisol to the fetus is restrained by estrogen-induced up-regulation of placental 11 $\beta$ -HSD, thereby increasing the placental glucocorticoid barrier. This in turn initiates development of the fetal HPA axis and thus promotes fetal autonomy. Interestingly, the rat placenta appears to exhibit the reverse pattern with respect to the placental glucocorticoid barrier, since 11 $\beta$ -HSD-2-specific bioactivity [13] and mRNA expression [13, 60] almost completely disappear in the labyrinth zone (the exchange area of the placenta) near term. This might appear counterintuitive given the potentially harmful effects of excess glucocorticoid exposure on fetal growth and subsequent development of adult disease; by this late stage of pregnancy, however, the rodent fetus has developed an effective HPA axis and considerable 11 $\beta$ -HSD-2 is expressed in various fetal organs [77], presumably allowing the fetus to cope with increased exposure to maternal glucocorticoids. Indeed, the latter could be advantageous to the fetus, since glucocorticoids promote the maturation of organ systems crucial for the successful transition to extrauterine life [3].

The question remains, however, as to why the opposite pattern of change occurs in the placental glucocorticoid barrier with advancing pregnancy in the rodent versus the primate. We have proposed [13] that it may relate to the evolution of a fetoplacental unit for estrogen synthesis in the higher primates (suborder Anthroidea). The basis of the fetoplacental unit is the placental utilization of fetal adrenal androgens for estrogen synthesis [78]; the rise in this syn-

thesis with advancing gestation reflects, in part, increased fetal androgen supply (for reviews see [68, 79]). Given that the trophic drive for this increase in fetal adrenal androgen secretion is at least in part fetal pituitary adrenocorticotrophic hormone, the loss of a placental glucocorticoid barrier and the associated passage of maternal glucocorticoids to the fetus would inhibit the fetal HPA axis and thus the supply of androgens to the placenta. This in turn would compromise the normal increase in placental estrogen synthesis that occurs late in primate pregnancy and is crucial for parturition [80]. In contrast, the rise in maternal estrogen observed near term in the rat is ovarian in origin [70] and thus not dependent on fetal adrenal status.

In addition to its proposed role in development of the fetal HPA axis, variations in placental 11 $\beta$ -HSD activity in the rat have been related to fetal growth and subsequent development of disease in adult life [8, 59, 81–83]. A large epidemiological study showed that adult humans with low birth weight in combination with large placental weight were at risk of developing hypertension [84]. It was proposed that this relationship may reflect increased exposure of the fetus to maternal glucocorticoids [8], since Benediktsson et al. [59] had found that rat placental 11 $\beta$ -dehydrogenase activity was positively correlated with term fetal weight and negatively correlated with placental weight. A positive association between birth weight and placental 11 $\beta$ -HSD activity has also been observed in the human [51]. Moreover, offspring of rats treated with the synthetic glucocorticoid dexamethasone during pregnancy had lower birth weights and higher adult blood pressure than offspring of control rats [59]. In contrast, inhibition of endogenous maternal and fetal glucocorticoid synthesis with maternal metyrapone treatment over the last week of pregnancy enhanced fetal growth by around 10% [9].

Collectively, the effects of these experimental manipulations of fetal glucocorticoid exposure suggest a critical role for placental 11 $\beta$ -HSD in the control of normal fetal growth and the subsequent development of adult disease. Accordingly, when 11 $\beta$ -HSD activity was inhibited by administration of carbenoxolone to rats throughout pregnancy, fetal growth was impaired and offspring became hypertensive [82] and exhibited hyperglycemia [83] as adults. Because these effects were dependent on the presence of the maternal adrenals, they presumably resulted from increased exposure of the fetus to maternal glucocorticoids associated with inhibition of placental 11 $\beta$ -HSD. Indeed, the ratio of radiolabeled corticosterone to 11-dehydrocorticosterone in fetuses of carbenoxolone-treated mothers infused with radiolabeled corticosterone was higher than in sham-treated controls [83], indicative of a reduction in the placental glucocorticoid barrier.

b) *Placental 11 $\beta$ -HSD as modulator of glucocorticoid and progesterone actions.* Placental 11 $\beta$ -HSD may also locally regulate access of glucocorticoids to their receptors within the placenta. Binding studies have demonstrated the presence of placental GR in several species including rodents [11, 12], rabbits [85], and humans [86–88]; and in the rat, comparable amounts of the GR are present in extracts of basal and labyrinth zones [12], consistent with recent observations of GR mRNA expression in these two regions [13].

Glucocorticoids could potentially affect a wide range of cellular functions within the placenta, from trophoblast differentiation soon after implantation to hormone synthesis in the fully formed placenta. In the rat, the basal zone of the placenta is the major site of peptide and steroid hor-

mone synthesis, and changes in 11 $\beta$ -HSD-1 and -2 expression in this zone are likely to reduce the concentration of active glucocorticoid near term [13, 60]. This reduction may contribute to the fall in basal zone 17 $\alpha$ -hydroxylase expression that occurs near term [89], since glucocorticoids are known to stimulate 17 $\alpha$ -hydroxylase in sheep placenta [90]. In contrast, glucocorticoids are potent inhibitors of prostaglandin synthesis and metabolism (for review see [91]), and inhibition of prostaglandin dehydrogenase (PGDH) activity by glucocorticoids was recently demonstrated in human placenta [92]. Thus, reduced basal zone glucocorticoid levels associated with 11 $\beta$ -HSD-1 and -2 changes may facilitate the dramatic increase in PGDH activity that occurs in this zone over the last 4 days of rat pregnancy [93]. Indeed, an opposite shift in the activity of PGDH occurs over the same period in the labyrinth zone, where active glucocorticoid levels are likely to increase due to reduced 11 $\beta$ -HSD-2 expression near term. Opposite changes in the two placental zones also occur in the synthesis of placental lactogen-II late in rat pregnancy, with an increase observed in the labyrinth zone and a decrease in the basal zone [94], raising the possibility that placental lactogen-II synthesis in the rat placenta is modulated by glucocorticoids and thus by 11 $\beta$ -HSD-1 and -2 expression.

There may also be a number of interactions between glucocorticoids and progesterone within the placenta, such as that recently demonstrated by Karalis et al. [10] in which the inhibition of corticotropin-releasing hormone synthesis by progesterone in cultured human trophoblasts was blocked by cortisol. This effect of progesterone may be mediated via the GR rather than the progesterone receptor (PR) [10], since there remains controversy as to whether PR is expressed by human trophoblast (e.g., see [10, 95]). Although the rat placenta does not produce corticotropin-releasing hormone, progesterone does have other important effects on placental function in this species, most notably with respect to growth [96]. Moreover, while mRNA for the GR has been localized to both placental zones [13], PR appear to be expressed only in the basal zone [97]. This raises the possibility that progesterone effects in the labyrinth zone may be mediated via the GR and as such could be susceptible to inhibition by glucocorticoids as occurs in human placental trophoblasts [10]. Progesterone action via the GR was recently shown to be critically important in relation to regression of the rat corpus luteum near the end of pregnancy [98], and the dramatic induction of luteal 11 $\beta$ -HSD-2 at this time [40] is likely to regulate physiological competition between progesterone and corticosterone for access to the GR. Thus, 11 $\beta$ -HSD-2 may play a role in mediating interactive effects of progesterone and glucocorticoids within the placenta similar to that demonstrated for the corpus luteum.

## DISCUSSION

In conclusion, 11 $\beta$ -HSD appears to play two distinct roles in the placenta—one in maintaining the placental glucocorticoid barrier between mother and fetus, and the other in modulating local actions of glucocorticoids and possibly progesterone within the placenta. Developmental changes in the completeness of the glucocorticoid barrier are important for fetal growth, development of the fetal HPA axis, and the final maturation of fetal organ systems. Moreover, given the pleiotypic effects of glucocorticoids on development, aberrations in the placental glucocorticoid barrier can profoundly influence the subsequent onset of disease in adult life. Since placental glucocorticoid metabolism also

determines local concentrations of active glucocorticoid, we suggest that placental expression of the 11 $\beta$ -HSD enzymes provides an important mechanism to regulate activation of the placental GR. Furthermore, recent reports showing that some progesterone effects are exerted via the GR suggest an additional role for placental 11 $\beta$ -HSD in regulating progesterone-glucocorticoid competition for access to GR, which in turn could impact on a wide range of placental functions.

## REFERENCES

- Mulay S, Solomon S. Adrenal cortical function during pregnancy. In: James VHT (ed.), *The Adrenal Gland*, 2nd ed. New York: Raven Press; 1991: 195–216.
- Atkinson HC, Waddell BJ. The hypothalamic-pituitary-adrenal axis in rat pregnancy and lactation: circadian variation and interrelationship of plasma adrenocorticotropin and corticosterone. *Endocrinology* 1995; 136:512–520.
- Liggins GC. The role of cortisol in preparing the fetus for birth. *Reprod Fertil Dev* 1994; 6:141–150.
- Challis JRG, Lye SJ. Parturition. In: Knobil E, Neill JD (eds.), *The Physiology of Reproduction*, 2nd ed. New York: Raven Press; 1994: 985–1031.
- Waddell BJ. The placenta as hypothalamus and pituitary: possible impact on maternal and fetal adrenal function. *Reprod Fertil Dev* 1993; 5:479–497.
- Reinisch JM, Simon NG. Prenatal exposure of prednisone in humans and animals retards intrauterine growth. *Science* 1978; 202:436–438.
- Yang K. Placental 11 $\beta$ -hydroxysteroid dehydrogenase: barrier to maternal glucocorticoids. *Rev Reprod* 1997; 2:129–132.
- Edwards CRW, Benediktsson R, Lindsay RS, Seckl J. Dysfunction of placental glucocorticoid barrier: link between fetal environment and adult hypertension? *Lancet* 1993; 341:355–357.
- Burton PJ, Waddell BJ. 11 $\beta$ -Hydroxysteroid dehydrogenase in the rat placenta: developmental changes and the effects of altered glucocorticoid exposure. *J Endocrinol* 1994; 143:505–513.
- Karalis K, Goodwin G, Majzoub JA. Cortisol blockade of progesterone: a possible mechanism involved in the initiation of human labor. *Nat Med* 1996; 2:556–560.
- Wong MD, Burton AF. Studies on corticosterone-receptor complexes from mouse placenta. *Can J Biochem* 1974; 52:190–195.
- Heller CL, Orti E, De Nicola AF. Regulatory factors of glucocorticoid binding in early and term rat placenta. *J Steroid Biochem* 1986; 25: 53–58.
- Waddell BJ, Benediktsson R, Brown RW, Seckl JR. Tissue specific messenger ribonucleic acid expression of 11 $\beta$ -hydroxysteroid dehydrogenase types 1 and 2 and the glucocorticoid receptor within rat placenta suggests exquisite local control of glucocorticoid action. *Endocrinology* 1998; 139:1517–1523.
- Funder JW. Glucocorticoid and mineralocorticoid receptors: biology and clinical relevance. *Annu Rev Med* 1997; 48:231–240.
- Monder C, White P. 11 $\beta$ -Hydroxysteroid dehydrogenase. *Vitam Horm* 1993; 47:187–271.
- White PC, Mune T, Agarwal AK. 11 $\beta$ -Hydroxysteroid dehydrogenase and the syndrome of apparent mineralocorticoid excess. *Endocr Rev* 1997; 18:135–156.
- Lakshmi V, Monder C. Purification and characterization of the corticosteroid 11 $\beta$ -dehydrogenase component of the rat liver 11 $\beta$ -hydroxysteroid dehydrogenase complex. *Endocrinology* 1988; 123:2390–2398.
- Agarwal AK, Monder C, Eckstein B, White PC. Cloning and expression of rat cDNA encoding corticosteroid 11 $\beta$ -dehydrogenase. *J Biol Chem* 1989; 264:18939–18943.
- Duperrex H, Kenouch S, Gaeggeler HP, Seckl JR, Edwards CRW. Rat liver 11 $\beta$ -hydroxysteroid dehydrogenase complementary deoxyribonucleic acid encodes oxoreductase activity in a mineralocorticoid responsive toad bladder cell line. *Endocrinology* 1993; 132:612–619.
- Low SC, Chapman KE, Edwards CRW, Seckl JR. "Liver-type" 11 $\beta$ -hydroxysteroid dehydrogenase cDNA encodes reductase but not dehydrogenase activity in intact mammalian COS-7 cells. *J Mol Endocrinol* 1994; 13:167–174.
- Jamieson PM, Chapman KC, Edwards CRW, Seckl JR. 11 $\beta$ -Hydroxysteroid dehydrogenase is an exclusive 11 $\beta$ -reductase in primary cultures of rat hepatocytes: effect of physicochemical and hormonal manipulations. *Endocrinology* 1995; 136:4754–4761.

22. Burton PJ, Dharmarajan AM, Hisheh S, Waddell BJ. Induction of myometrial 11 $\beta$ -hydroxysteroid dehydrogenase type 1 messenger ribonucleic acid and protein expression late in rat pregnancy. *Endocrinology* 1996; 135:5700–5706.
23. Monder C, Lakshmi V. Corticosteroid 11 $\beta$ -hydrogenase of rat tissue: immunological studies. *Endocrinology* 1990; 126:2435–2443.
24. Lakshmi V, Sakai RR, McEwen BS, Monder C. Regional distribution of 11-beta-hydroxysteroid dehydrogenase in rat brain. *Endocrinology* 1991; 128:1741–1748.
25. Seckl JR. 11 $\beta$ -Hydroxysteroid dehydrogenase in the brain: a novel regulator of glucocorticoid action? *Front Neuroendocrinol* 1997; 18: 49–99.
26. Albiston AL, Smith RE, Krozowski ZS. Changes in the levels of 11 $\beta$ -hydroxysteroid dehydrogenase mRNA over the oestrous cycle in the rat. *J Steroid Biochem Mol Biol* 1995; 52:45–48.
27. Arcuri F, Monder C, Lockwood CJ, Schatz F. Expression of 11 $\beta$ -hydroxysteroid dehydrogenase during decidualization of human endometrial stromal cells. *Endocrinology* 1996; 137:595–600.
28. Burton PJ, Krozowski ZS, Waddell BJ. Immunolocalisation of 11 $\beta$ -hydroxysteroid dehydrogenase types 1 and 2 in rat uterus: variation across the estrous cycle and regulation by estrogen and progesterone. *Endocrinology* 1998; 139:376–382.
29. Benediktsson R, Yau JLW, Low S, Brett LP, Cooke BE, Edwards CRW, Seckl JR. 11 $\beta$ -Hydroxysteroid dehydrogenase in the rat ovary: high expression in the oocyte. *J Endocrinol* 1992; 135:53–58.
30. Albiston AL, Obeyesekere VR, Smith RE, Krozowski ZS. Cloning and tissue specific distribution of the human 11 $\beta$ -hydroxysteroid dehydrogenase type 2 enzyme. *Mol Cell Endocrinol* 1994; 105:R11–R17.
31. Agarwal AK, Mune T, Monder C, White PC. NAD<sup>+</sup>-dependent isoform of 11 $\beta$ -hydroxysteroid dehydrogenase: cloning and characterization of cDNA from sheep kidney. *J Biol Chem* 1994; 269:25959–25962.
32. Zhou M-Y, Gomez-Sanchez EP, Cox DL, Cosby D, Gomez-Sanchez CE. Cloning, expression, and tissue distribution of the rat nicotinamide adenine dinucleotide-dependent 11 $\beta$ -hydroxysteroid dehydrogenase. *Endocrinology* 1995; 136:3729–3734.
33. Naray-Fejes-Toth A, Fejes-Toth G. Expression cloning of the aldosterone target cell-specific 11 $\beta$ -hydroxysteroid dehydrogenase from rabbit collecting duct cells. *Endocrinology* 1995; 136:2579–2586.
34. Cole T. Cloning of the mouse 11 $\beta$ -hydroxysteroid dehydrogenase type 2 gene: tissue specific expression and localization in distal convoluted tubules and collecting ducts of the kidney. *Endocrinology* 1995; 136: 4693–4696.
35. Brown RW, Chapman KE, Murad P, Edwards CRW, Seckl JR. Purification of 11 $\beta$ -hydroxysteroid dehydrogenase type 2 from human placenta utilizing a novel affinity labelling technique. *Biochem J* 1996; 313:997–1005.
36. Naray-Fejes-Toth A, Fejes-Toth G. Extranuclear localization of endogenous 11 $\beta$ -hydroxysteroid dehydrogenase-2 in aldosterone target tissues. *Endocrinology* 1998; 139:2955–2959.
37. Li KXZ, Smith RE, Ferrari P, Funder JW, Krozowski ZS. Rat 11 $\beta$ -hydroxysteroid dehydrogenase type 2 enzyme is expressed at low levels in placenta and is modulated by adrenal steroids in the kidney. *Mol Cell Endocrinol* 1996; 120:67–77.
38. Smith RE, Maguire JA, Stein-Oakley AN, Sasano H, Takahashi K-I, Fukushima K, Krozowski ZS. Localization of 11 $\beta$ -hydroxysteroid dehydrogenase type II in human epithelial tissues. *J Clin Endocrinol Metab* 1996; 81:344–3248.
39. Roland BL, Funder JW. Localization of 11 $\beta$ -hydroxysteroid dehydrogenase type 2 in rat tissues: *in situ* studies. *Endocrinology* 1996; 137: 1123–1128.
40. Waddell BJ, Benediktsson R, Seckl JR. 11 $\beta$ -Hydroxysteroid dehydrogenase type 2 in the rat corpus luteum: induction of messenger ribonucleic acid expression and bioactivity coincident with luteal regression. *Endocrinology* 1996; 137:5386–5391.
41. DeCourcy C, Gray CH, Lunn JB. Adrenocortical hormones in human placenta. *Nature* 1952; 170:494.
42. Berliner DL, Jones JE, Salhanick HA. The isolation of adrenal like steroids from human placenta. *J Biol Chem* 1956; 223:1043–1053.
43. Osinski PA. Steroid 11 $\beta$ -dehydrogenase in human placenta. *Nature* 1960; 187:777.
44. Pasqualini JR, Nguyen BL, Uhrich F, Wiqvist N, Diczfalusy E. Cortisol and cortisone metabolism in the human foeto-placental unit at midgestation. *J Steroid Biochem* 1970; 1:209–219.
45. Murphy BEP, Clark IR, Donald IR, Pinsky M, Vedady D. Conversion of maternal cortisol during placental transfer to the human fetus. *Am J Obstet Gynecol* 1974; 118:538–563.
46. Murphy BEP. Ontogeny of cortisol-cortisone interconversion in human tissues: a role for cortisone in human fetal development. *J Steroid Biochem* 1981; 14:811–817.
47. Pepe GJ, Albrecht ED. Comparison of cortisol-cortisone interconversion *in vitro* by human and baboon placenta. *Steroids* 1984; 44:229–240.
48. Brown RW, Chapman KE, Edwards CRW, Seckl JR. Human placental 11 $\beta$ -hydroxysteroid dehydrogenase: evidence for and partial purification of a distinct NAD-dependent isoform. *Endocrinology* 1993; 132:2614–2621.
49. Brown RW, Chapman KE, Koteslevy Y, Yau JL, Lindsay RM, Brett L, Leckie CM, Murad P, Lyons V, Mullins JJ, Edwards CRW, Seckl JR. Cloning and production of antisera to human placental 11 $\beta$ -hydroxysteroid dehydrogenase type 2. *Biochem J* 1996; 313:1007–1017.
50. Lakshmi V, Nath N, Muneyirci-Delale O. Characterization of 11 $\beta$ -hydroxysteroid dehydrogenase of human placenta: evidence for the existence of two species of 11 $\beta$ -hydroxysteroid dehydrogenase. *J Steroid Biochem Mol Biol* 1993; 45:391–397.
51. Stewart PM, Rogerson FM, Mason JI. Type 2 11 $\beta$ -hydroxysteroid dehydrogenase messenger ribonucleic acid and activity in human placenta and fetal membranes: its relationship to birth weight and putative role in fetal adrenal steroidogenesis. *J Clin Endocrinol Metab* 1995; 80:885–890.
52. Baggia S, Albrecht ED, Babischkin JS, Pepe GJ. Interconversion of cortisol and cortisone in baboon trophoblast and decidua cells in culture. *Endocrinology* 1990; 127:1735–1741.
53. Baggia S, Albrecht ED, Pepe GJ. Regulation of 11 $\beta$ -hydroxysteroid dehydrogenase activity in the baboon placenta by estrogen. *Endocrinology* 1990; 126:2742–2748.
54. Pepe GJ, Waddell BJ, Burch MG, Albrecht ED. Interconversion of cortisol and cortisone in the baboon placenta at midgestation: expression of 11 $\beta$ -hydroxysteroid dehydrogenase type 1 messenger RNA. *J Steroid Biochem Mol Biol* 1996; 58:403–410.
55. Pepe GJ, Babischkin JS, Burch MG, Leavitt MG, Albrecht ED. Developmental increase in expression of the messenger ribonucleic acid and protein levels of 11 $\beta$ -hydroxysteroid dehydrogenase types 1 and 2 in baboon placenta. *Endocrinology* 1996; 137:5678–5684.
56. Yang K, Smith C, Dales D, Hammond GL, Challis JRG. Cloning of an ovine 11 $\beta$ -hydroxysteroid dehydrogenase complementary deoxyribonucleic acid: tissue and temporal distribution of its messenger ribonucleic acid during fetal and neonatal development. *Endocrinology* 1992; 131:2120–2126.
57. Yang K. Co-expression of two distinct isoforms of 11 $\beta$ -hydroxysteroid dehydrogenase in the ovine placenta. *J Steroid Biochem Mol Biol* 1995; 52:337–343.
58. Heller CL, Weisenberg LS, Orti E, De Nicola AF. Steps in the glucocorticoid action in normal and diabetic rat placenta. *J Steroid Biochem* 1988; 31:119–123.
59. Benediktsson R, Lindsay RS, Noble J, Seckl JR, Edwards CRW. Glucocorticoid exposure in utero: new model for adult hypertension. *Lancet* 1993; 341:339–341.
60. Burton PJ, Smith RE, Krozowski ZS, Waddell BJ. Zonal distribution of 11 $\beta$ -hydroxysteroid dehydrogenase types 1 and 2 messenger ribonucleic acid expression in the rat placenta and decidua during late pregnancy. *Biol Reprod* 1996; 55:1023–1028.
61. Klemcke HG, Christenson RK. Porcine 11 $\beta$ -hydroxysteroid dehydrogenase activity. *Biol Reprod* 1996; 55:217–223.
62. Krozowski Z, Maguire JA, Stein-Oakley N, Dowling J, Smith RE, Andrews RK. Immunohistochemical localization of the of 11 $\beta$ -hydroxysteroid dehydrogenase type II enzyme in human kidney and placenta. *J Clin Endocrinol Metab* 1995; 80:2203–2209.
63. Sun K, Yang K, Challis JRG. Differential expression of 11 $\beta$ -hydroxysteroid dehydrogenase types 1 and 2 in human placenta and fetal membranes. *J Clin Endocrinol Metab* 1996; 82:300–305.
64. Stewart PM, Murray BA, Mason JI. Type 2 11 $\beta$ -hydroxysteroid dehydrogenase in human fetal tissues. *J Clin Endocrinol Metab* 1994; 78:1529–1532.
65. Sun K, Yang K, Challis JRG. Regulation of 11 $\beta$ -hydroxysteroid dehydrogenase type 2 by progesterone, estrogen, and cyclic adenosine 5'-monophosphate pathway in cultured human placental chorionic trophoblasts. *Biol Reprod* 1998; 58:1379–1384.
66. Gao H-B, Ge R-S, Lakshmi V, Marandici A, Hardy MP. Hormonal regulation of oxidative and reductive activities of 11 $\beta$ -hydroxysteroid dehydrogenase in rat Leydig cells. *Endocrinology* 1997; 138:151–161.
67. Giannopoulos G, Jackson K, Tulchinsky D. Glucocorticoid metabo-

- lism in human placenta, decidua, myometrium and fetal membranes. *J Steroid Biochem* 1982; 17:371–374.
68. Pepe GJ, Albrecht ED. Regulation of the primate fetal adrenal cortex. *Endocr Rev* 1990; 11:151–176.
  69. Pepe GJ, Waddell BJ, Stahl SJ, Albrecht ED. The regulation of trans-placental cortisol-cortisone metabolism by estrogen in pregnant baboons. *Endocrinology* 1988; 122:78–83.
  70. Taya K, Greenwald GS. In vivo and in vitro ovarian steroidogenesis in the pregnant rat. *Biol Reprod* 1981; 25:683–691.
  71. Matt DW, MacDonald GJ. Placental steroid production by the basal and labyrinth zones during the latter third of gestation in the rat. *Biol Reprod* 1985; 32:969–977.
  72. Lopez-Bernal A, Flint APF, Anderson ABM, Turnbull AC.  $11\beta$ -Hydroxysteroid dehydrogenase activity (E.C.1.1.1.146) in human placenta and decidua. *J Steroid Biochem* 1980; 13:1081–1087.
  73. Waddell BJ, Albrecht ED, Pepe GJ. Metabolism of cortisol and cortisone in the baboon fetus at midgestation. *Endocrinology* 1988; 122:84–88.
  74. Pepe GJ, Waddell BJ, Albrecht ED. Activation of the baboon fetal hypothalamic-pituitary-adrenocortical axis at midgestation by estrogen-induced changes in placental corticosteroid metabolism. *Endocrinology* 1990; 127:3117–3123.
  75. Seckl JR. Glucocorticoids, feto-placental  $11\beta$ -hydroxysteroid dehydrogenase type 2, and the early life origins of adult disease. *Steroids* 1997; 62:89–94.
  76. Pepe GJ, Albrecht ED. Actions of placental and fetal adrenal steroid hormones in primate pregnancy. *Endocr Rev* 1995; 16:608–648.
  77. Brown RW, Diaz R, Robson AC, Kotelevtsev YV, Mullins JJ, Kaufman MH, Seckl JR. The ontogeny of  $11\beta$ -hydroxysteroid dehydrogenase type 2 and mineralocorticoid receptor gene expression reveal intricate control of glucocorticoid action in development. *Endocrinology* 1996; 137:794–797.
  78. Diczfalusy E. Endocrine function of the human fetal placental unit. *Fed Proc* 1964; 23:791–798.
  79. Mesiano S, Jaffe RB. Developmental and functional biology of the primate fetal adrenal cortex. *Endocr Rev* 1997; 18:378–403.
  80. Mecnas CA, Giussani DA, Owiny JR, Jenkins SL, Wu WX, Honnabier BO, Lockwood CJ, Kong L, Guller S, Nathanielsz PW. Production of premature delivery in pregnant rhesus monkeys by androstenedione infusion. *Nat Med* 1996; 2:443–448.
  81. Langley-Evans SC, Phillips GJ, Benediktsson R, Gardner DS, Edwards CRW, Jackson AA, Seckl JR. Protein intake in pregnancy, placental glucocorticoid metabolism and the programming of hypertension in the rat. *Placenta* 1996; 17:169–172.
  82. Lindsay RM, Edwards CR, Seckl JR. Inhibition of  $11\beta$ -hydroxysteroid dehydrogenase in pregnant rats and the programming of blood pressure in the offspring. *Hypertension* 1996; 27:1200–1204.
  83. Lindsay RS, Lindsay RM, Waddell BJ, Seckl JR. Prenatal glucocorticoid exposure leads to offspring hyperglycemia in the rat: studies with  $11\beta$ -hydroxysteroid dehydrogenase inhibitor carbenoxolone. *Diabetologia* 1996; 39:1299–1305.
  84. Barker DJP, Bull AR, Osmond C, Simmonds SJ. Fetal and placental size and the risk of hypertension in adult life. *Br Med J* 1990; 301:1019–1022.
  85. Giannopoulos G, Hassan Z, Solomon S. Glucocorticoid receptors in fetal and adult rabbit tissues. *J Biol Chem* 1974; 249:2424–2427.
  86. Speeg KV, Harrison RW. The ontogeny of the human placental glucocorticoid receptor and inducibility of heat-stable alkaline phosphatase. *Endocrinology* 1979; 104:1364–1368.
  87. Giannopoulos G, Jackson K, Tulchinsky D. Specific glucocorticoid binding in human uterine tissues, placenta and fetal membranes. *J Steroid Biochem* 1983; 19:1375–1378.
  88. Lopez-Bernal A, Anderson ABM, Turnbull AC. The measurement of glucocorticoid receptors in human placental cytosol. *Placenta* 1984; 5:105–116.
  89. Johnson DC. Cellular localization and factors controlling rat placental cytochrome P450<sub>17 $\alpha$</sub>  (CYP17): $17\alpha$ hydroxylase/C<sub>17,20</sub>-lyase activity. *Biol Reprod* 1992; 22:1136–1141.
  90. Steele PA, Flint APF, Turnbull AC. Activity of steroid C-17,20-lyase in the ovine placenta: effect of exposure to foetal glucocorticoid. *J Endocrinol* 1976; 69:239–246.
  91. Russo-Marie F. Glucocorticoid control of eicosanoid synthesis. *Semin Nephrol* 1990; 10:421–429.
  92. Patel FA, Clifton VL, Challis JRG. Regulation of prostaglandin dehydrogenase activity by cortisol in human term placenta and fetal membranes. *J Soc Gynecol Invest* 1997; 4(suppl): abstract 125.
  93. Nagai K, Nabekura H, Mibe M, Ohshige T, Mori N. Prostaglandin dehydrogenase activity in placenta and in maternal lung, kidney, and gastric mucosa during rat pregnancy. *Mol Cell Endocrinol* 1991; 80:153–163.
  94. Campbell WJ, Deb S, Kwok SCM, Joslin AA, Soares MJ. Differential expression of placental lactogen-II and prolactin-like protein-A in the rat chorioallantoic placenta. *Endocrinology* 1989; 125:1565–1574.
  95. Shanker YG, Sharma SC, Rao AJ. Expression of progesterone receptor mRNA in the first trimester human placenta. *Biochem Mol Biol Intern* 1997; 42:1235–1240.
  96. Ogle TF, Mills TM, Costoff A. Progesterone maintenance of the placental progesterone receptor and placental growth in ovariectomized rats. *Biol Reprod* 1990; 43:276–284.
  97. Ogle TF, Mills TM, Soares MJ. Changes in cytosolic and nuclear progesterone receptors during pregnancy in rat placenta. *Biol Reprod* 1989; 40:1012–1019.
  98. Sugino N, Telleria CM, Gibori G. Progesterone inhibits  $20\alpha$ -hydroxysteroid dehydrogenase expression in rat corpus luteum through the glucocorticoid receptor. *Endocrinology* 1997; 138:4497–4500.
